# Supplementary material
Source: publisher site journal article supplement (https://www.spandidos-publications.com/5887/downloadSupplementary)

Figure S1. Data extraction flow of the present study. The final analysis included 1,974 articles.

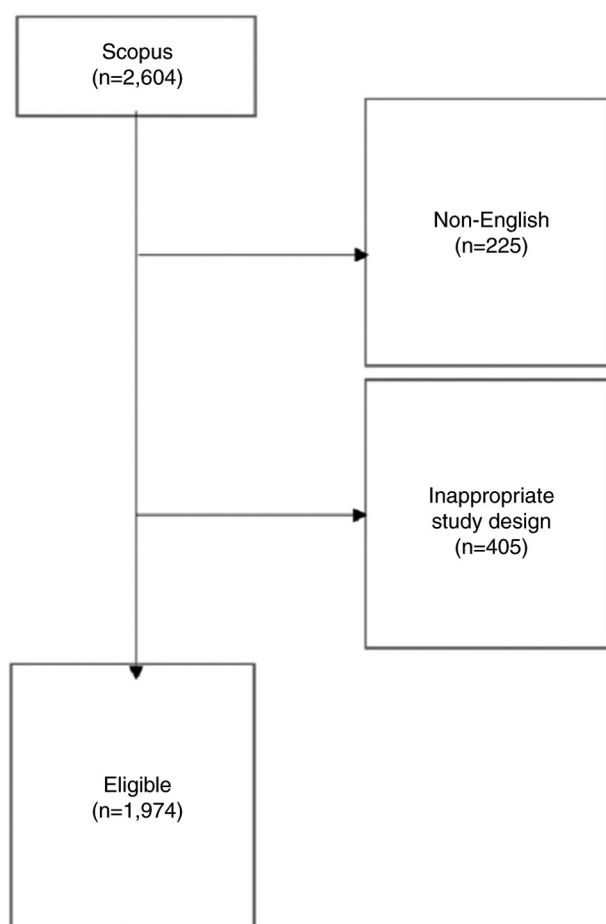

Supplement: Supplementary file [file downloadSupplementary]
